# Supplementary material for: Evaluation der betriebsärztlichen und sicherheitstechnischen Betreuung von Kleinstbetrieben in Gesundheitsdienst und Wohlfahrtspflege durch Kompetenzzentren
Source: Springer Nature journal article supplement (doi:10.1007/s40664-023-00522-z), 2023-11-07
Supplement: MOESM7 [file 26274818]

Online-Tab. Arbeitsschutzniveau (Summen-Score) getrennt nach Branche KPZT3; VG

| **Branche / Arbeitsschutzniveau** | **KPZT3-Gruppe  n (%)** | **VG  n (%)** | **p-Wert** |
| --- | --- | --- | --- |
| **Friseurhandwerk** | | | **0,653** |
| niedrig 0 – 2 Punkte | 57 (20,0) | 57 (23,4) |
| mittel 3 – 4 Punkte | 153 (53,7) | 124 (50,8) |
| hoch 5 – 6 Punkte | 75 (26,3) | 63 (25,8) |
| **Gesamt** | 285 (100,0) | 244 (100,0) |
| **Kita** | | | **0,323** |
| niedrig 0 – 2 Punkte | 10 (29,4) | 9 (17,0) |
| mittel 3 – 4 Punkte | 15 (44,1) | 24 (45,3) |
| hoch 5 – 6 Punkte | 9 (26,5) | 20 (37,7) |
| **Gesamt** | 34 (100,0) | 53 (100,0) |
| **Humanmedizin** | | | **0,217** |
| niedrig 0 – 2 Punkte | 7 (7,2) | 35 (10,6) |
| mittel 3 – 4 Punkte | 23 (23,7) | 99 (30,0) |
| hoch 5 – 6 Punkte | 67 (69,1) | 196 (59,4) |
| **Gesamt** | 97 (100,0) | 330 (100,0) |
